# Supplementary material
Source: PubMed Central journal article supplement (PMC1544167)

**A**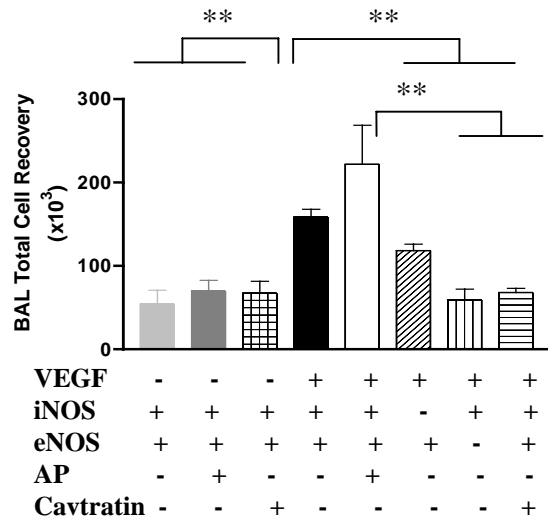**B**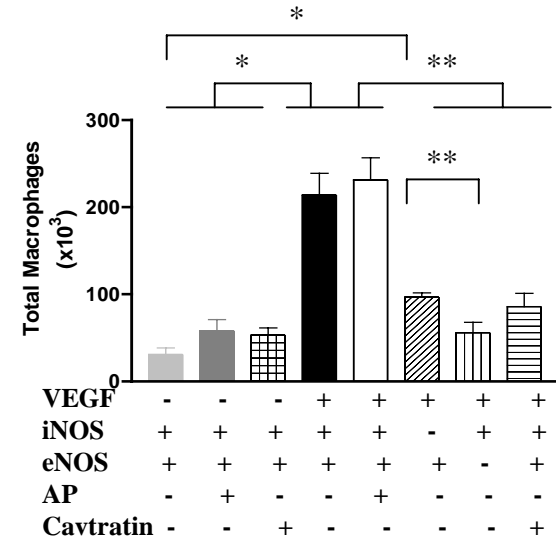**C**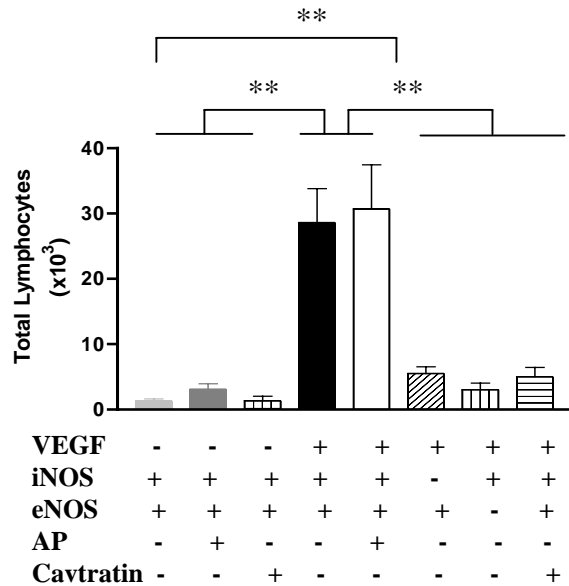**D**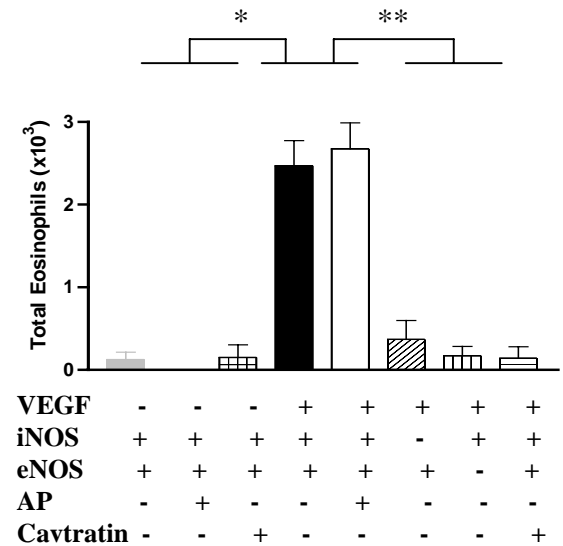

Supplement: pnas_0601057103_1.pdf [file pnas_0601057103_1.pdf]

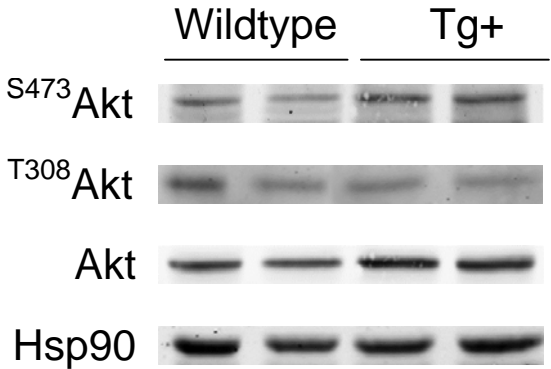

Supplement: pnas_0601057103_2.pdf [file pnas_0601057103_2.pdf]

iNOS

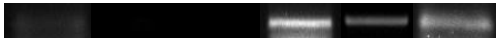

eNOS

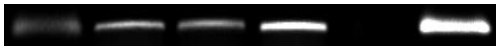

$\beta$ -actin

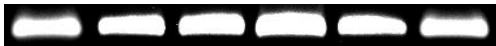

VEGF

- - - + + +

AP

- + - + - -

Cavtratin

- - + - + -

Supplement: pnas_0601057103_3.pdf [file pnas_0601057103_3.pdf]

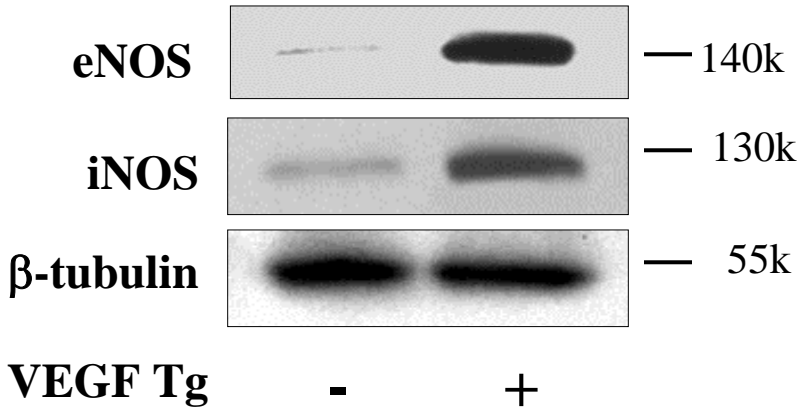

Supplement: pnas_0601057103_4.pdf [file pnas_0601057103_4.pdf]
